# Supplementary material for: Anthropogenic emission largely enhances nocturnal oxidation chemistry in the upper mixing layer of megacities
Source: Research Square preprint supplement (doi:10.21203/rs.3.rs-7100046/v1), 2025-07-29
Supplement: Supplementary file 1 [file 062435e618fdd721867ab834.docx]

**Supplementary for**

**Wang et al.,**

Text S1

The observation of Guangzhou Tower (23.11 ° N, 113.33 ° E) is located in the center of urban Guangzhou and is greatly affected by local emissions. The observation period spans January, April, July, and October from 2014 to 2020. However, data for July 2017, 2018, and 2020, as well as October 2020, are missing. The Guangzhou tower has four atmospheric observation platforms (surface, 118 m, 168 m, and 488 m) (1). Due to the lack of surface data in 2014, a national station (Guangdong University of Commerce) located closer to Guangzhou Tower was selected for supplementation.

The vertical observation data of Shenzhen is derived from the Shenzhen Meteorological Gradient Tower (SZMGT) (22.65 ° N, 113 .89 ° E), which is in a forested area near the Tiegang Reservoir. It is worth noting that there are highways and airports approximately 800 meters northeast and 10 kilometers west of SZMGT, respectively. Therefore, the observation results may be affected by vehicle and aircraft emissions. The tower is 365 meters and consists of 13 meteorological observation platforms and 4 atmospheric observation platforms, located at 60/70 m, 110/120 m, 210/220 m, 325/335 m, respectively (2). This study analyzed vertical NOx and O3 data from January 1, 2022 to December 31, 2022. To ensure consistency in the pollutants and temperature measurements at various heights, one-dimensional linear interpolation was employed on 13-layer meteorological observations to obtain temperatures at 65 m, 115 m, 215 m, and 330 m. Additionally, since the observation of the lowest layer of pollutants is 60 meters away from the ground, the average data from two national stations (Nanhaizi and Huaqiaocheng) closer to the SZMGT was selected to supplement the surface data of the SZMGT.

The vertical observation data of Beijing is obtained from the Meteorological Tower of the Institute of Atmospheric Physics (IAP), which is in the center of Beijing (39.98° N, 116.37° E), making it susceptible to local emissions. The observation period spans January, April, July, and October 2019. The IAP Tower has four atmospheric observation platforms (8 m, 60 m, 160 m, and 280 m), with NO2 and O3 observed by chemiluminescence and UV photometry, respectively (3,4). Considering the missing vertical observation data, we used the characteristic that Ox (NO2+O3) remains generally constantly in the vertical direction during nighttime to supplement the missing data. The missing NO2 or O3 concentrations at a specific height and time can be estimated by the Ox from other heights at the same time.

Vertical profiles of USA were obtained from an experiment called Nitrogen, Aerosol Composition, and Halogens on a Tall Tower (NACHTT), conducted in February and March 2011 in Eric, CO (40.05° N, 105.00° W) (5), which is a mixed rural and suburban area. The instrument is installed on the elevator of the Tower, which ascends and descends at a rate of 0.5 m s-1, a profile can be obtained in approximately 10 minutes. To be consistent with the time resolution of Guangzhou, Shenzhen, and Beijing Tower, the time resolution of data in Eric, CO was averaged to 1 hour. The maximum observation height was limited to 270 m.

**References**

1. C. He *et al.*, The unexpected high frequency of nocturnal surface ozone enhancement events over China: characteristics and mechanisms. *Atmos. Chem. Phys.* **22**, 15243-15261 (2022).

2. L. Li *et al.*, Impact of the COVID-19 on the vertical distributions of major pollutants from a tower in the Pearl River Delta. *Atmos. Environ.* **276**, (2022).

3. Y. Liu *et al.*, Decadal changes in ozone in the lower boundary layer over Beijing, China. *Atmos. Environ.* **275**, 119018 (2022).

4. X. Chen *et al.*, Field Determination of Nitrate Formation Pathway in Winter Beijing. *Environ. Sci. Technol..* **54**, 9243-9253(2020).

5. S. S. Brown *et al.*, Nitrogen, Aerosol Composition, and Halogens on a Tall Tower (NACHTT): Overview of a wintertime air chemistry field study in the front range urban corridor of Colorado. *J. Geophys. Res.-Atmos.* **118**, 8067-8085 (2013).
